# Supplementary material
Source: Springer Nature journal article supplement (https://www.springermedizin.de/resource/supplementary/12885_2014_5198_MOESM7_ESM.pdf/9468570)
Supplement: MOESM7 [file 9468570]

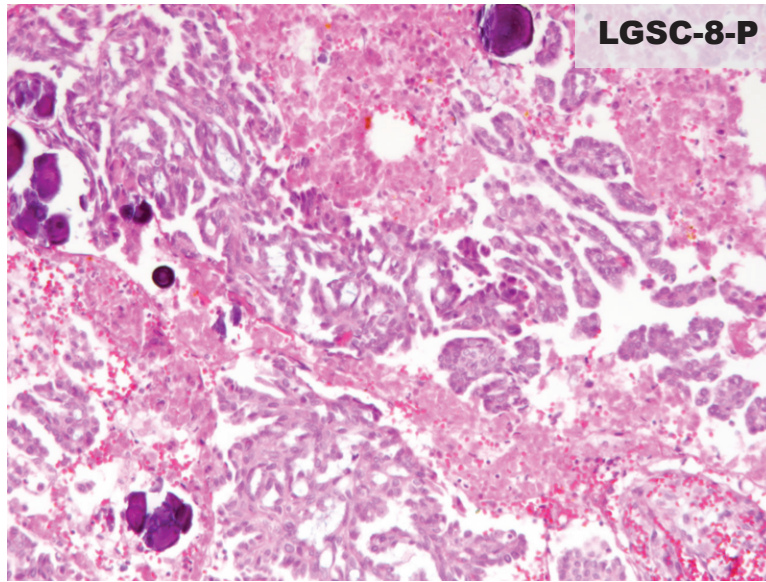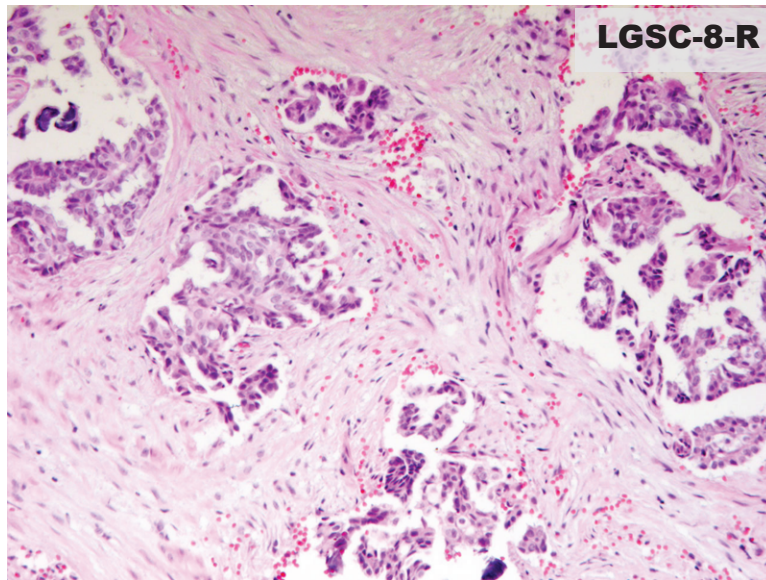

**Additional File 9. LGSC-8 Case Images.**
